# Supplementary material
Source: PubMed Central journal article supplement (PMC4139156)
Supplement: bi500730t_si_001.pdf [file bi500730t_si_001.pdf]

## Supporting Information

1. Qdot motility assay movie of  $\beta$ Mys.
2. Figure S2
3. Figure S3

## Analytical Comparison of Natural and Pharmaceutical Ventricular Myosin Activators

Yihua Wang<sup>1</sup>, Katalin Ajtai<sup>1</sup>, and Thomas P. Burghardt<sup>1,2</sup>

<sup>1</sup> Department of Biochemistry and Molecular Biology

<sup>2</sup> Department of Physiology and Biomedical Engineering

Mayo Clinic Rochester

Rochester, MN 55905

001 507 284 8120

001 507 284 9349 (FAX)

[burghardt@mayo.edu](mailto:burghardt@mayo.edu)

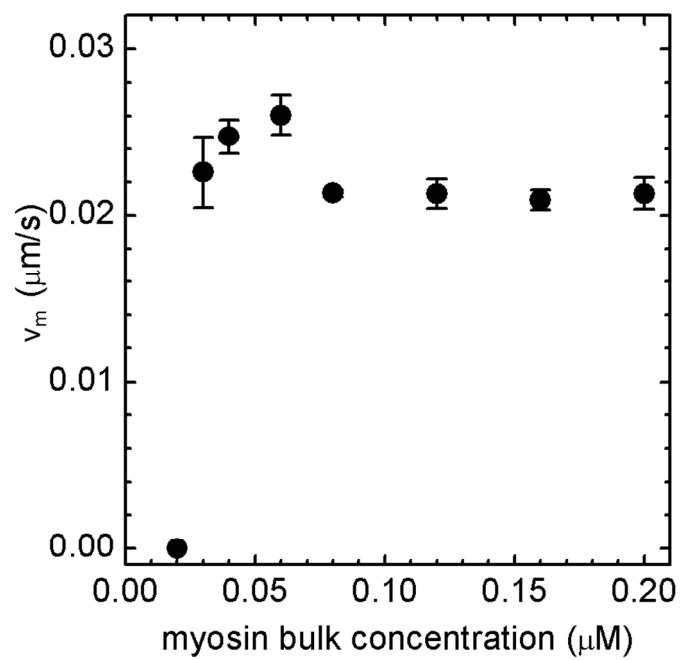

**Figure S2.** In vitro  $\beta$ Mys motility in 1.5  $\mu\text{M}$  OM and 1% DMSO and for various myosin bulk concentrations. Mean  $\pm$  SD are plotted.

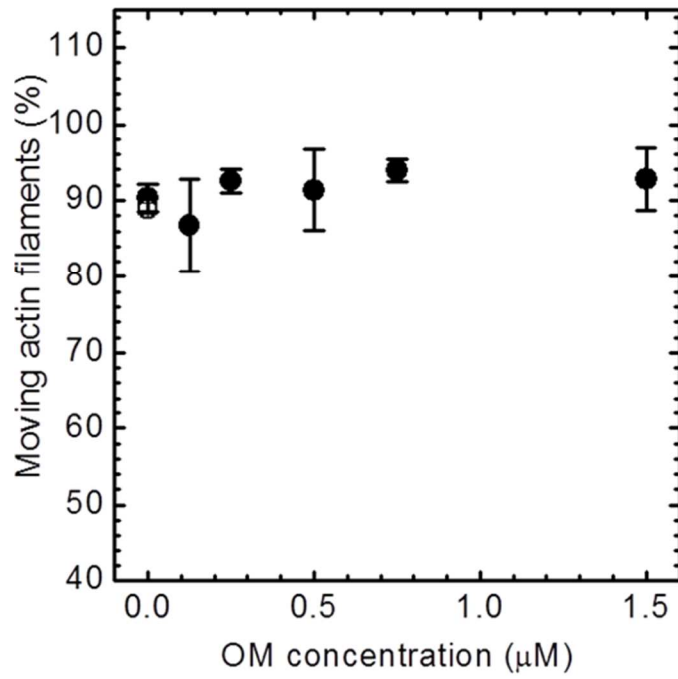

**Figure S3.** The percentage of moving actin filaments from  $\beta$ Mys motility for various concentrations of OM. Motility assay buffers contain 1% DMSO (solid circles) or no DMSO (open circle). Mean  $\pm$  SD are plotted. Bulk concentration of  $\beta$ Mys was 0.2  $\mu$ M.
